# Supplementary material
Source: publisher figshare collection journal article supplement (https://rs.figshare.com/ndownloader/files/14701295)
Supplement: Supplementary file 1 [file 14701295]

Hybridization between sympatric hammerhead sharks in the western North Atlantic Ocean
AM Barker, DH Adams, WB Driggers III, BS Frazier, DS Portnoy

>CC_015_F1
AATAATGAAATGCTTTATACATTCAATATTATTGGTATTTGCTTTCCAAAGAGGATTAATGATCATGTTTTTATTACAAG
ATTGATCGCTAATCAAAAAACCCAAACTGGCCCTACATGGCGTGACATTCTCCATCCCCTTGTGTTATGGTGAGCTTGAC
AATCTCATTTCTAGAATGATGGATATAGTGACGTTGCAGGAAAGTGTCGAGGATAGCTCAAGTCTACCTTAATGAACCAG
ATGAGCCCTTCCGGGGAATAGCTATTTGCTTCATACCGAAAAAAAAAAACTTAGAGGACTGGAAATCTTGATCGGGACAT
GGAATGAATGACAATCGAGGGAGCTAGGGGAAGATAAATCTTGACCGAGACATGGAATGAATGACAACCGAGGGAACTAG
GGGAAAGTAAATCTTGACCGAGACATGGAATGAATGTCAATCGAGCATTAACTATATTGCCATTTTATTCATAATCAGAG
GATAAAACAATAGTAATACATAAATTAGGGTTAAGCAAGGTATTTATGTTATTGAATTGTTGGTAATAAGTTAATGAGGG
TTAAGTAGTTTAATGTAATGAGATTAGTGGAATGTCGATTAATGAGGATTATACATAGTATGTAATGATGTAGTGGAATG
TCTATTAATGGGGATTATACATAGTATGTAATGATATAGTGGT
>CC_035_ScallBX
AATAATGAAATGCTTTATACATTCAATATTATTGGTATTTGCTTTCCAAAGAGGATTAATGATCATGTTTTTATTACAAG
ATTGATCGCTAATCAAAAAACCCAAACTGGCCCTACATGGCGTGACATTCTCCATCCCCTTGTGTTATGGTGAGCTTGAC
AATCTCATTTCTAGAATGATGGATATAGTGACGTTGCAGGAAAGTGTCGAGGATAGCTCAAGTCTACCTTAATGAACCAG
ATGAGCCCTTCCGGGGAATAGCTATTTGCTTCATACCGAAAAAAAAAAACTTAGAGGACTGGAAATCTTGATCGGGACAT
GGAATGAATGACAATCGAGGGAGCTAGGGGAAGATAAATCTTGACCGAGACATGGAATGAATGACAACCGAGGGAACTAG
GGGAAAGTAAATCTTGACCGAGACATGGAATGAATGTCAATCGAGCATTAACTATATTGCCATTTTATTCATAATCAGAG
GATAAAACAATAGTAATACATAAATTAGGGTTAAGCAAGGTATTTATGTTATTGAATTGTTGGTAATAAGTTAATGAGGG
TTAAGTAGTTTAATGTAATGAGATTAGTGGAATGTCGATTAATGAGGATTATACATAGTATGTAATGATGTAGTGGAATG
TCTATTAATGGGGATTATACATAGTATGTAATGATATAGTGGT
>CC_098_CarBX
AATAATGAAATGCTTTATACATTCAATATTATTGGTATTTGCTTTCCAAAGAGGATTAATGATCATGTTTTTATTACAAG
ATTGATCGCTAATCAAAAAACCCAAACTGGCCCTACATGGCGTGACATTCTCCATCCCCTTGTGTTATGGTGAGCTTGAC
AATCTCATTTCTAGAATGATGGATATAGTGACGTTGCAGGAAAGTGTCGAGGATAGCTCAAGTCTACCTTAATGAACCAG
ATGAGCCCTTCCGGGGAATAGCTATTTGCTTCATACCGAAAAAAAAAAACTTAGAGGACTGGAAATCTTGATCGGGACAT
GGAATGAATGACAATCGAGGGAGCTAGGGGAAGATAAATCTTGACCGAGACATGGAATGAATGACAACCGAGGGAACTAG
GGGAAAGTAAATCTTGACCGAGACATGGAATGAATGTCAATCGAGCATTAACTATATTGCCATTTTATTCATAATCAGAG
GATAAAACAATAGTAATACATAAATTAGGGTTAAGCAAGGTATTTATGTTATTGAATTGTTGGTAATAAGTTAATGAGGG
TTAAGTAGTTTAATGTAATGAGATTAGTGGAATGTCGATTAATGAGGATTATACATAGTATGTAATGATGTAGTGGAATG
TCTATTAATGGGGATTATACATAGTATGTAATGATATAGTGGT
>SC_057_ScallBX
AATAATGAAATGCTTTATACATTCAATATTATTGGTATTTGCTTTCCAAAGAGGATTAATGATCATGTTTTTATTACAAG
ATTGATCGCTAATCAAAAAACCCAAACTGGCCCTACATGGCGTGACATTCTCCATCCCCTTGTGTTATGGTGAGCTTGAC
AATCTCATTTCTAGAATGATGGATATAGTGACGTTGCAGGAAAGTGTCGAGGATAGCTCAAGTCTACCTTAATGAACCAG
ATGAGCCCTTCCGGGGAATAGCTATTTGCTTCATACCGAAAAAAAAAAACTTAGAGGACTGGAAATCTTGATCGGGACAT
GGAATGAATGACAATCGAGGGAGCTAGGGGAAGATAAATCTTGACCGAGACATGGAATGAATGACAACCGAGGGAACTAG
GGGAAAGTAAATCTTGACCGAGACATGGAATGAATGTCAATCGAGCATTAACTATATTGCCATTTTATTCATAATCAGAG
GATAAAACAATAGTAATACATAAATTAGGGTTAAGCAAGGTATTTATGTTATTGAATTGTTGGTAATAAGTTAATGAGGG
TTAAGTAGTTTAATGTAATGAGATTAGTGGAATGTCGATTAATGAGGATTATACATAGTATGTAATGATGTAGTGGAATG
TCTATTAATGGGGATTATACATAGTATGTAATGATATAGTGGT
>SC_064_F1
AATAATGAAATGCTTTATACATTCAATATTATTGGTATTTGCTTTCCAAAGAGGATTAATGATCATGTTTTTATTACAAG
ATTGATCGCTAATCAAAAAACCCAAACTGGCCCTACATGGCGTGACATTCTCCATCCCCTTGTGTTATGGTGAGCTTGAC
AATCTCATTTCTAGAATGATGGATATAGTGACGTTGCAGGAAAGTGTCGAGGATAGCTCAAGTCTACCTTAATGAACCAG
ATGAGCCCTTCCGGGGAATAGCTATTTGCTTCATACCGAAAAAAAAAAACTTAGAGGACTGGAAATCTTGATCGGGACAT
GGAATGAATGACAATCGAGGGAGCTAGGGGAAGATAAATCTTGACCGAGACATGGAATGAATGACAACCGAGGGAACTAG
GGGAAAGTAAATCTTGACCGAGACATGGAATGAATGTCAATCGAGCATTAACTATATTGCCATTTTATTCATAATCAGAG
GATAAAACAATAGTAATACATAAATTAGGGTTAAGCAAGGTATTTATGTTATTGAATTGTTGGTAATAAGTTAATGAGGG
TTAAGTAGTTTAATGTAATGAGATTAGTGGAATGTCGATTAATGAGGATTATACATAGTATGTAATGATGTAGTGGAATG
TCTATTAATGGGGATTATACATAGTATGTAATGATATAGTGGT
>SC_089_F1
AATAATGAAATGCTTTATACATTCAATATTATTGGTATTTGCTTTCCAAAGAGGATTAATGATCATGTTTTTATTACAAG
ATTGATCGCTAATCAAAAAACCCAAACTGGCCCTACATGGCGTGACATTCTCCATCCCCTTGTGTTATGGTGAGCTTGAC
AATCTCATTTCTAGAATGATGGATATAGTGACGTTGCAGGAAAGTGTCGAGGATAGCTCAAGTCTACCTTAATGAACCAG
ATGAGCCCTTCCGGGGAATAGCTATTTGCTTCATACCGAAAAAAAAAAACTTAGAGGACTGGAAATCTTGATCGGGACAT
GGAATGAATGACAATCGAGGGAGCTAGGGGAAGATAAATCTTGACCGAGACATGGAATGAATGACAACCGAGGGAACTAG
GGGAAAGTAAATCTTGACCGAGACATGGAATGAATGTCAATCGAGCATTAACTATATTGCCATTTTATTCATAATCAGAG
GATAAAACAATAGTAATACATAAATTAGGGTTAAGCAAGGTATTTATGTTATTGAATTGTTGGTAATAAGTTAATGAGGG
TTAAGTAGTTTAATGTAATGAGATTAGTGGAATGTCGATTAATGAGGATTATACATAGTATGTAATGATGTAGTGGAATG
TCTATTAATGGGGATTATACATAGTATGTAATGATATAGTGGT
>CC_031_F1
AATAATGAAATGCTTTATACATTCAATATTATTGGTATTTGCTTTCCAAAGAGGATTAATGATCATGTTTTTATTACAAG
ATTGATCGCTAATCAAAAAACCCAAACTGGCCCTACATGGCGTGACATTCTCCATCCCCTTGTGTTATGGTGAGCTTGAC
AATCTCATTTCTAGAATGATGGATATAGTGACGTTGCAGGAAAGTGTCGAGGATAGCTCAAGTCTACCTTAATGAACCAG
ATGAGCCCTTCCGGGGAATAGCTATTTGCTTCATACCGAAAAAAAAAAACTTAGAGGACTGGAAATCTTGATCGGGACAT
GGAATGAATGACAATCGAGGGAGCTAGGGGAAGATAAATCTTGACCGAGACATGGAATGAATGACAACCGAGGGAACTAG
GGGAAAGTAAATCTTGACCGAGACATGGAATGAATGTCAATCGAGCATTAACTATATTGCCATTTTATTCATAATCAGAG
GATAAAACAATAGTAATACATAAATTAGGGTTAAGCAAGGTATTTATGTTATTGAATTGTTGGTAATAAGTTAATGAGGG
TTAAGTAGTTTAATGTAATGAGATTAGTGGAATGTCGATTAATGAGGATTATACATAGTATGTAATGATGTAGTGGAATG
TCTATTAATGGGGATTATACATAGTATGTAATGATATAGTGGT
>GA_047_ScallBX
AATAATGAAATGCTTTATACATTCAATATTATTGGTATTTGCTTTCCAAAGAGGATTAATGATCATGTTTTTATTACAAG
ATTGATCGCTAATCAAAAAACCCAAACTGGCCCTACATGGCGTGACATTCTCCATCCCCTTGTGTTATGGTGAGCTTGAC
AATCTCATTTCTAGAATGATGGATATAGTGACGTTGCAGGAAAGTGTCGAGGATAGCTCAAGTCTACCTTAATGAACCAG
ATGAGCCCTTCCGGGGAATAGCTATTTGCTTCATACCGAAAAAAAAAAACTTAGAGGACTGGAAATCTTGATCGGGACAT
GGAATGAATGACAATCGAGGGAGCTAGGGGAAGATAAATCTTGACCGAGACATGGAATGAATGACAACCGAGGGAACTAG
GGGAAAGTAAATCTTGACCGAGACATGGAATGAATGTCAATCGAGCATTAACTATATTGCCATTTTATTCATAATCAGAG
GATAAAACAATAGTAATACATAAATTAGGGTTAAGCAAGGTATTTATGTTATTGAATTGTTGGTAATAAGTTAATGAGGG
TTAAGTAGTTTAATGTAATGAGATTAGTGGAATGTCGATTAATGAGGATTATACATAGTATGTAATGATGTAGTGGAATG
TCTATTAATGGGGATTATACATAGTATGTAATGATATAGTGGT
>SC_017_F1
AATAATGAAATGCTTTATACATTCAATATTATTGGTATTTGCTTTCCAAAGAGGATTAATGATCATGTTTTTATTACAAG
ATTGATCGCTAATCAAAAAACCCAAACTGGCCCTACATGGCGTGACATTCTCCATCCCCTTGTGTTATGGTGAGCTTGAC
AATCTCATTTCTAGAATGATGGATATAGTGACGTTGCAGGAAAGTGTCGAGGATAGCTCAAGTCTACCTTAATGAACCAG
ATGAGCCCTTCCGGGGAATAGCTATTTGCTTCATACCGAAAAAAAAAAACTTAGAGGACTGGAAATCTTGATCGGGACAT
GGAATGAATGACAATCGAGGGAGCTAGGGGAAGATAAATCTTGACCGAGACATGGAATGAATGACAACCGAGGGAACTAG
GGGAAAGTAAATCTTGACCGAGACATGGAATGAATGTCAATCGAGCATTAACTATATTGCCATTTTATTCATAATCAGAG
GATAAAACAATAGTAATACATAAATTAGGGTTAAGCAAGGTATTTATGTTATTGAATTGTTGGTAATAAGTTAATGAGGG
TTAAGTAGTTTAATGTAATGAGATTAGTGGAATGTCGATTAATGAGGATTATACATAGTATGTAATGATGTAGTGGAATG
TCTATTAATGGGGATTATACATAGTATGTAATGATATAGTGGT
>SC_032_ScallBX
AATAATGAAATGCTTTATACATTCAATATTATTGGTATTTGCTTTCCAAAGAGGATTAATGATCATGTTTTTATTACAAG
ATTGATCGCTAATCAAAAAACCCAAACTGGCCCTACATGGCGTGACATTCTCCATCCCCTTGTGTTATGGTGAGCTTGAC
AATCTCATTTCTAGAATGATGGATATAGTGACGTTGCAGGAAAGTGTCGAGGATAGCTCAAGTCTACCTTAATGAACCAG
ATGAGCCCTTCCGGGGAATAGCTATTTGCTTCATACCGAAAAAAAAAAACTTAGAGGACTGGAAATCTTGATCGGGACAT
GGAATGAATGACAATCGAGGGAGCTAGGGGAAGATAAATCTTGACCGAGACATGGAATGAATGACAACCGAGGGAACTAG
GGGAAAGTAAATCTTGACCGAGACATGGAATGAATGTCAATCGAGCATTAACTATATTGCCATTTTATTCATAATCAGAG
GATAAAACAATAGTAATACATAAATTAGGGTTAAGCAAGGTATTTATGTTATTGAATTGTTGGTAATAAGTTAATGAGGG
TTAAGTAGTTTAATGTAATGAGATTAGTGGAATGTCGATTAATGAGGATTATACATAGTATGTAATGATGTAGTGGAATG
TCTATTAATGGGGATTATACATAGTATGTAATGATATAGTGGT
>SC_051_ScallBX
AATAATGAAATGCTTTATACATTCAATATTATTGGTATTTGCTTTCCAAAGAGGATTAATGATCATGTTTTTATTACAAG
ATTGATCGCTAATCAAAAAACCCAAACTGGCCCTACATGGCGTGACATTCTCCATCCCCTTGTGTTATGGTGAGCTTGAC
AATCTCATTTCTAGAATGATGGATATAGTGACGTTGCAGGAAAGTGTCGAGGATAGCTCAAGTCTACCTTAATGAACCAG
ATGAGCCCTTCCGGGGAATAGCTATTTGCTTCATACCGAAAAAAAAAAACTTAGAGGACTGGAAATCTTGATCGGGACAT
GGAATGAATGACAATCGAGGGAGCTAGGGGAAGATAAATCTTGACCGAGACATGGAATGAATGACAACCGAGGGAACTAG
GGGAAAGTAAATCTTGACCGAGACATGGAATGAATGTCAATCGAGCATTAACTATATTGCCATTTTATTCATAATCAGAG
GATAAAACAATAGTAATACATAAATTAGGGTTAAGCAAGGTATTTATGTTATTGAATTGTTGGTAATAAGTTAATGAGGG
TTAAGTAGTTTAATGTAATGAGATTAGTGGAATGTCGATTAATGAGGATTATACATAGTATGTAATGATGTAGTGGAATG
TCTATTAATGGGGATTATACATAGTATGTAATGATATAGTGGT
>SC_066_ScallBX
AATAATGAAATGCTTTATACATTCAATATTATTGGTATTTGCTTTCCAAAGAGGATTAATGATCATGTTTTTATTACAAG
ATTGATCGCTAATCAAAAAACCCAAACTGGCCCTACATGGCGTGACATTCTCCATCCCCTTGTGTTATGGTGAGCTTGAC
AATCTCATTTCTAGAATGATGGATATAGTGACGTTGCAGGAAAGTGTCGAGGATAGCTCAAGTCTACCTTAATGAACCAG
ATGAGCCCTTCCGGGGAATAGCTATTTGCTTCATACCGAAAAAAAAAAACTTAGAGGACTGGAAATCTTGATCGGGACAT
GGAATGAATGACAATCGAGGGAGCTAGGGGAAGATAAATCTTGACCGAGACATGGAATGAATGACAACCGAGGGAACTAG
GGGAAAGTAAATCTTGACCGAGACATGGAATGAATGTCAATCGAGCATTAACTATATTGCCATTTTATTCATAATCAGAG
GATAAAACAATAGTAATACATAAATTAGGGTTAAGCAAGGTATTTATGTTATTGAATTGTTGGTAATAAGTTAATGAGGG
TTAAGTAGTTTAATGTAATGAGATTAGTGGAATGTCGATTAATGAGGATTATACATAGTATGTAATGATGTAGTGGAATG
TCTATTAATGGGGATTATACATAGTATGTAATGATATAGTGGT
>SC_075_ScallBX
AATAATGAAATGCTTTATACATTCAATATTATTGGTATTTGCTTTCCAAAGAGGATTAATGATCATGTTTTTATTACAAG
ATTGATCGCTAATCAAAAAACCCAAACTGGCCCTACATGGCGTGACATTCTCCATCCCCTTGTGTTATGGTGAGCTTGAC
AATCTCATTTCTAGAATGATGGATATAGTGACGTTGCAGGAAAGTGTCGAGGATAGCTCAAGTCTACCTTAATGAACCAG
ATGAGCCCTTCCGGGGAATAGCTATTTGCTTCATACCGAAAAAAAAAAACTTAGAGGACTGGAAATCTTGATCGGGACAT
GGAATGAATGACAATCGAGGGAGCTAGGGGAAGATAAATCTTGACCGAGACATGGAATGAATGACAACCGAGGGAACTAG
GGGAAAGTAAATCTTGACCGAGACATGGAATGAATGTCAATCGAGCATTAACTATATTGCCATTTTATTCATAATCAGAG
GATAAAACAATAGTAATACATAAATTAGGGTTAAGCAAGGTATTTATGTTATTGAATTGTTGGTAATAAGTTAATGAGGG
TTAAGTAGTTTAATGTAATGAGATTAGTGGAATGTCGATTAATGAGGATTATACATAGTATGTAATGATGTAGTGGAATG
TCTATTAATGGGGATTATACATAGTATGTAATGATATAGTGGT
>SC_309_ScallBX
AATAATGAAATGCTTTATACATTCAATATTATTGGTATTTGCTTTCCAAAGAGGATTAATGATCATGTTTTTATTACAAG
ATTGATCGCTAATCAAAAAACCCAAACTGGCCCTACATGGCGTGACATTCTCCATCCCCTTGTGTTATGGTGAGCTTGAC
AATCTCATTTCTAGAATGATGGATATAGTGACGTTGCAGGAAAGTGTCGAGGATAGCTCAAGTCTACCTTAATGAACCAG
ATGAGCCCTTCCGGGGAATAGCTATTTGCTTCATACCGAAAAAAAAAAACTTAGAGGACTGGAAATCTTGATCGGGACAT
GGAATGAATGACAATCGAGGGAGCTAGGGGAAGATAAATCTTGACCGAGACATGGAATGAATGACAACCGAGGGAACTAG
GGGAAAGTAAATCTTGACCGAGACATGGAATGAATGTCAATCGAGCATTAACTATATTGCCATTTTATTCATAATCAGAG
GATAAAACAATAGTAATACATAAATTAGGGTTAAGCAAGGTATTTATGTTATTGAATTGTTGGTAATAAGTTAATGAGGG
TTAAGTAGTTTAATGTAATGAGATTAGTGGAATGTCGATTAATGAGGATTATACATAGTATGTAATGATGTAGTGGAATG
TCTATTAATGGGGATTATACATAGTATGTAATGATATAGTGGT
>SC_334_ScallBX
AATAATGAAATGCTTTATACATTCAATATTATTGGTATTTGCTTTCCAAAGAGGATTAATGATCATGTTTTTATTACAAG
ATTGATCGCTAATCAAAAAACCCAAACTGGCCCTACATGGCGTGACATTCTCCATCCCCTTGTGTTATGGTGAGCTTGAC
AATCTCATTTCTAGAATGATGGATATAGTGACGTTGCAGGAAAGTGTCGAGGATAGCTCAAGTCTACCTTAATGAACCAG
ATGAGCCCTTCCGGGGAATAGCTATTTGCTTCATACCGAAAAAAAAAAACTTAGAGGACTGGAAATCTTGATCGGGACAT
GGAATGAATGACAATCGAGGGAGCTAGGGGAAGATAAATCTTGACCGAGACATGGAATGAATGACAACCGAGGGAACTAG
GGGAAAGTAAATCTTGACCGAGACATGGAATGAATGTCAATCGAGCATTAACTATATTGCCATTTTATTCATAATCAGAG
GATAAAACAATAGTAATACATAAATTAGGGTTAAGCAAGGTATTTATGTTATTGAATTGTTGGTAATAAGTTAATGAGGG
TTAAGTAGTTTAATGTAATGAGATTAGTGGAATGTCGATTAATGAGGATTATACATAGTATGTAATGATGTAGTGGAATG
TCTATTAATGGGGATTATACATAGTATGTAATGATATAGTGGT
>GA_059_F1
AATAATGAAATGCTTTATACATTCAATATTATTGGTATTTGCTTTCCAAAGAGGATTAATGATCATGTTTTTATTACAAG
ATTGATCGCTAATCAAAAAACCCAAACTGGCCCTACATGGCGTGACATTCTCCATCCCCTTGTGTTATGGTGAGCTTGAC
AATCTCATTTCTAGAATGATGGATATAGTGACGTTGCAGGAAAGTGTCGAGGATAGCTCAAGTCTACCTTAATGAACCAG
ATGAGCCCTTCCGGGGAATAGCTATTTGCTTCATACCGAAAAAAAAAAACTTAGAGGACTGGAAATCTTGATCGGGACAT
GGAATGAATGACAATCGAGGGAGCTAGGGGAAGATAAATCTTGACCGAGACATGGAATGAATGACAACCGAGGGAACTAG
GGGAAAGTAAATCTTGACCGAGACATGGAATGAATGTCAATCGAGCATTAACTATATTGCCATTTTATTCATAATCAGAG
GATAAAACAATAGTAATACATAAATTAGGGTTAAGCAAGGTATTTATGTTATTGAATTGTTGGTAATAAGTTAATGAGGG
TTAAGTAGTTTAATGTAATGAGATTAGTGGAATGTCGATTAATGAGGATTATACATAGTATGTAATGATGTAGTGGAATG
TCTATTAATGGGGATTATACATAGTATGTAATGATATAGTGGT
>SC_012_F1
AATAATGAAATGCTTTATACATTCAATATTATTGGTATTTGCTTTCCAAAGAGGATTAATGATCATGTTTTTATTACAAG
ATTGATCGCTAATCAAAAAACCCAAACTGGCCCTACATGGCGTGACATTCTCCATCCCCTTGTGTTATGGTGAGCTTGAC
AATCTCATTTCTAGAATGATGGATATAGTGACGTTGCAGGAAAGTGTCGAGGATAGCTCAAGTCTACCTTAATGAACCAG
ATGAGCCCTTCCGGGGAATAGCTATTTGCTTCATACCGAAAAAAAAAAACTTAGAGGACTGGAAATCTTGATCGGGACAT
GGAATGAATGACAATCGAGGGAGCTAGGGGAAGATAAATCTTGACCGAGACATGGAATGAATGACAACCGAGGGAACTAG
GGGAAAGTAAATCTTGACCGAGACATGGAATGAATGTCAATCGAGCATTAACTATATTGCCATTTTATTCATAATCAGAG
GATAAAACAATAGTAATACATAAATTAGGGTTAAGCAAGGTATTTATGTTATTGAATTGTTGGTAATAAGTTAATGAGGG
TTAAGTAGTTTAATGTAATGAGATTAGTGGAATGTCGATTAATGAGGATTATACATAGTATGTAATGATGTAGTGGAATG
TCTATTAATGGGGATTATACATAGTATGTAATGATATAGTGGT
>SC_063_ScallBX
AATAATGAAATGCTTTATACATTCAATATTATTGGTATTTGCTTTCCAAAGAGGATTAATGATCATGTTTTTATTACAAG
ATTGATCGCTAATCAAAAAACCCAAACTGGCCCTACATGGCGTGACATTCTCCATCCCCTTGTGTTATGGTGAGCTTGAC
AATCTCATTTCTAGAATGATGGATATAGTGACGTTGCAGGAAAGTGTCGAGGATAGCTCAAGTCTACCTTAATGAACCAG
ATGAGCCCTTCCGGGGAATAGCTATTTGCTTCATACCGAAAAAAAAAAACTTAGAGGACTGGAAATCTTGATCGGGACAT
GGAATGAATGACAATCGAGGGAGCTAGGGGAAGATAAATCTTGACCGAGACATGGAATGAATGACAACCGAGGGAACTAG
GGGAAAGTAAATCTTGACCGAGACATGGAATGAATGTCAATCGAGCATTAACTATATTGCCATTTTATTCATAATCAGAG
GATAAAACAATAGTAATACATAAATTAGGGTTAAGCAAGGTATTTATGTTATTGAATTGTTGGTAATAAGTTAATGAGGG
TTAAGTAGTTTAATGTAATGAGATTAGTGGAATGTCGATTAATGAGGATTATACATAGTATGTAATGATGTAGTGGAATG
TCTATTAATGGGGATTATACATAGTATGTAATGATATAGTGGT
>GA_036_ScallBX
AATAATGAAATGCTTTATACATTCAATATTATTGGTATTTGCTTTCCAAAGAGGATTAATGATCATGTTTTTATTACAAG
ATTGATCGCTAATCAAAAAACCCAAACTGGCCCTACATGGCGTGACATTCTCCATCCCCTTGTGTTATGGTGAGCTTGAC
AATCTCATTTCTAGAATGATGGATATAGTGACGTTGCAGGAAAGTGTCGAGGATAGCTCAAGTCTACCTTAATGAACCAG
ATGAGCCCTTCCGGGGAATAGCTATTTGCTTCATACCGAAAAAAAAAAACTTAGAGGACTGGAAATCTTGATCGGGACAT
GGAATGAATGACAATCGAGGGAGCTAGGGGAAGATAAATCTTGACCGAGACATGGAATGAATGACAACCGAGGGAACTAG
GGGAAAGTAAATCTTGACCGAGACATGGAATGAATGTCAATCGAGCATTAACTATATTGCCATTTTATTCATAATCAGAG
GATAAAACAATAGTAATACATAAATTAGGGTTAAGCAAGGTATTTATGTTATTGAATTGTTGGTAATAAGTTAATGAGGG
TTAAGTAGTTTAATGTAATGAGATTAGTGGAATGTCGATTAATGAGGATTATACATAGTATGTAATGATGTAGTGGAATG
TCTATTAATGGGGATTATACATAGTATGTAATGATATAGTGGT
>SC_039_ScallBX
AATAATGAAATGCTTTATACATTCACTATTATTGGTATT-GCTTTCC-AAGAGGATTAATGATCATGTTTTTATTACAAG
ATTGATCGCTAATCAAAAAACCCAAACTTGCCCTACATGGCGTGACATTCTCCATCCCCTTGTGTTATGGTGAGCTTGAC
AATCTAATCTCAAGAATGATAGATGTAGTGATGTTGCAGTAAAGTGTCGAGGATAGCTCAAGTTTACCTGAATGAACCAG
ATGAGCCCTTCCGGGGAATAGCTATTTGCTTCATACCGAAAAAAAAAAACTTAAAGGACTGGAAATCTTGATCGAGACAT
GGAATGAATGACAATTAAGGGAGCTAGGGGATAGNANATCTTGACCGAGACATGGAATGAATGACAATTAAGGGAACTAG
GGGACAGTAAATCTTGACCGAGACATGGAATGAATGTCAATCGAGCATTAACTATATTGCCATTTTACTCATGATTAGAG
GATTAAACAATAGTAATACATAAATTAGGGTTAAGCAAGGTATTTATGTTATTGAATTGTTGGTTATAAGTTAATGAGGG
TTAAGT-GTTTAGTGTAATGAGATTAGTGGAACGTCGATTAATGGGGATTAAACATAGTATGTAATGATGTAGTGGAATG
TCTATTAATGAGGATTAAACATAGTATGTAATGATATAGTGGT
